# Supplementary material for: Lung Inflammatory Phenotype in Mice Deficient in Fibulin-2 and ADAMTS-12
Source: MDPI journal article supplement (doi:10.3390/ijms25042024), 2024-02-07
Supplement: s1 [file s1]

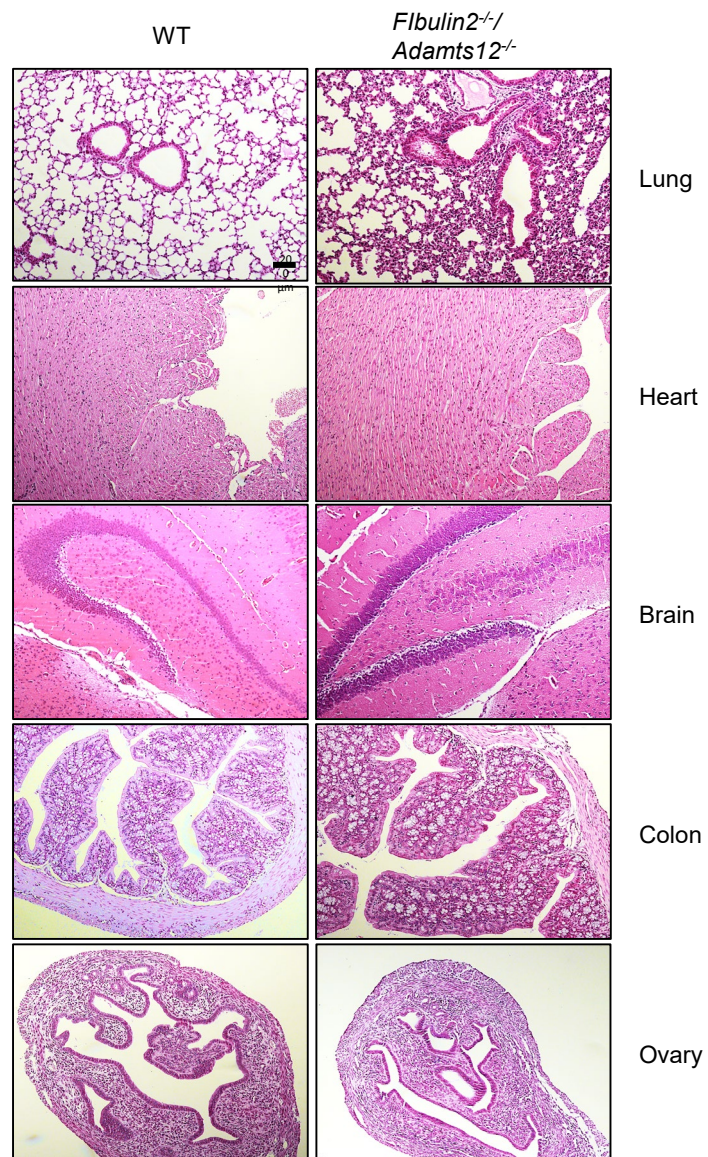

**Figure S1.** Haemotoxilin/eosin stained sections of the indicated tissues in WT and *fibulin2*<sup>-/-</sup>/*Adams12*<sup>-/-</sup> mice. Scale bar: 200µm

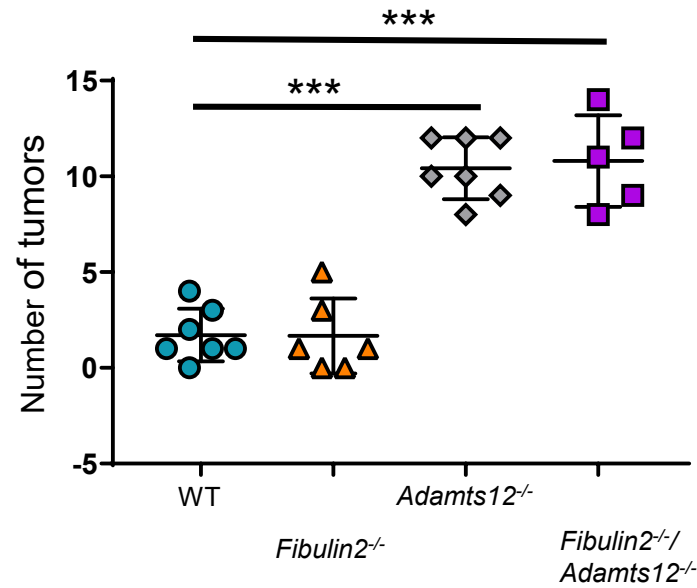

**Figure S2.** Lung cancer susceptibility of WT, *fibulin2*<sup>-/-</sup>, *Adamts12*<sup>-/-</sup> and *fibulin2*<sup>-/-</sup>/*ADAMTS-12*<sup>-/-</sup> mice.. Urethane lung carcinogenesis model in the indicated mice strains. The graph indicates the total number of tumors presented in the whole left lung of mice by tumor counting in haematoxylin/eosin stained sections.
